# Supplementary material for: Transposons-Based Clonal Diversity in Trematode Involves Parts of CR1 (LINE) in Eu- and Heterochromatin
Source: MDPI journal article supplement (doi:10.3390/genes12081129), 2021-07-25
Supplement: s1 [file s1]

## Supplementary materials

# Transposons' based clonal diversity in Trematode involves parts of CR1 (LINE) in eu- and heterochromatin

**Anna Solovyeva<sup>1</sup>, Ivan Levakin<sup>2</sup>, Evgeny Zorin<sup>3</sup>, Leonid Adonin<sup>4</sup>, Yuri Khotimchenko<sup>5</sup>, Olga Podgornaya<sup>1,6</sup>**

### Author affiliations

1 — Institute of Cytology of the Russian Academy of Science, 194064 St.Petersburg Tikhoretsky ave. 4, Russia; anna\_i\_solovyeva@incras.ru)

2 — Zoological Institute of the Russian Academy of Sciences, 199034, St.Petersburg Universitetskaya nab. 1, Russia; levakin2@gmail.com

3 — All-Russia research institute for agricultural microbiology, 196608, Pushkin 8, Podbelsky chausse, 3, Russia; kjokkjok8@gmail.com

4 — Moscow Institute of Physics and Technology, 141701 Dolgoprudny, Institutskiy per. 9, Russia; Leo.Adonin@gmail.com

5 — Far Eastern Federal University, 690091, Vladivostok, Sukhanova st., 8., Russia; khotimchenko.ys@dvfu.ru

6 - Saint-Petersburg State University, 199034, St.Petersburg, Universitetskaya nab. 7/9, Russia; opodg@yahoo.com

\* Correspondence and requests for materials should be addressed to A. Solovyeva. (email: anna\_i\_solovyeva@incras.ru)

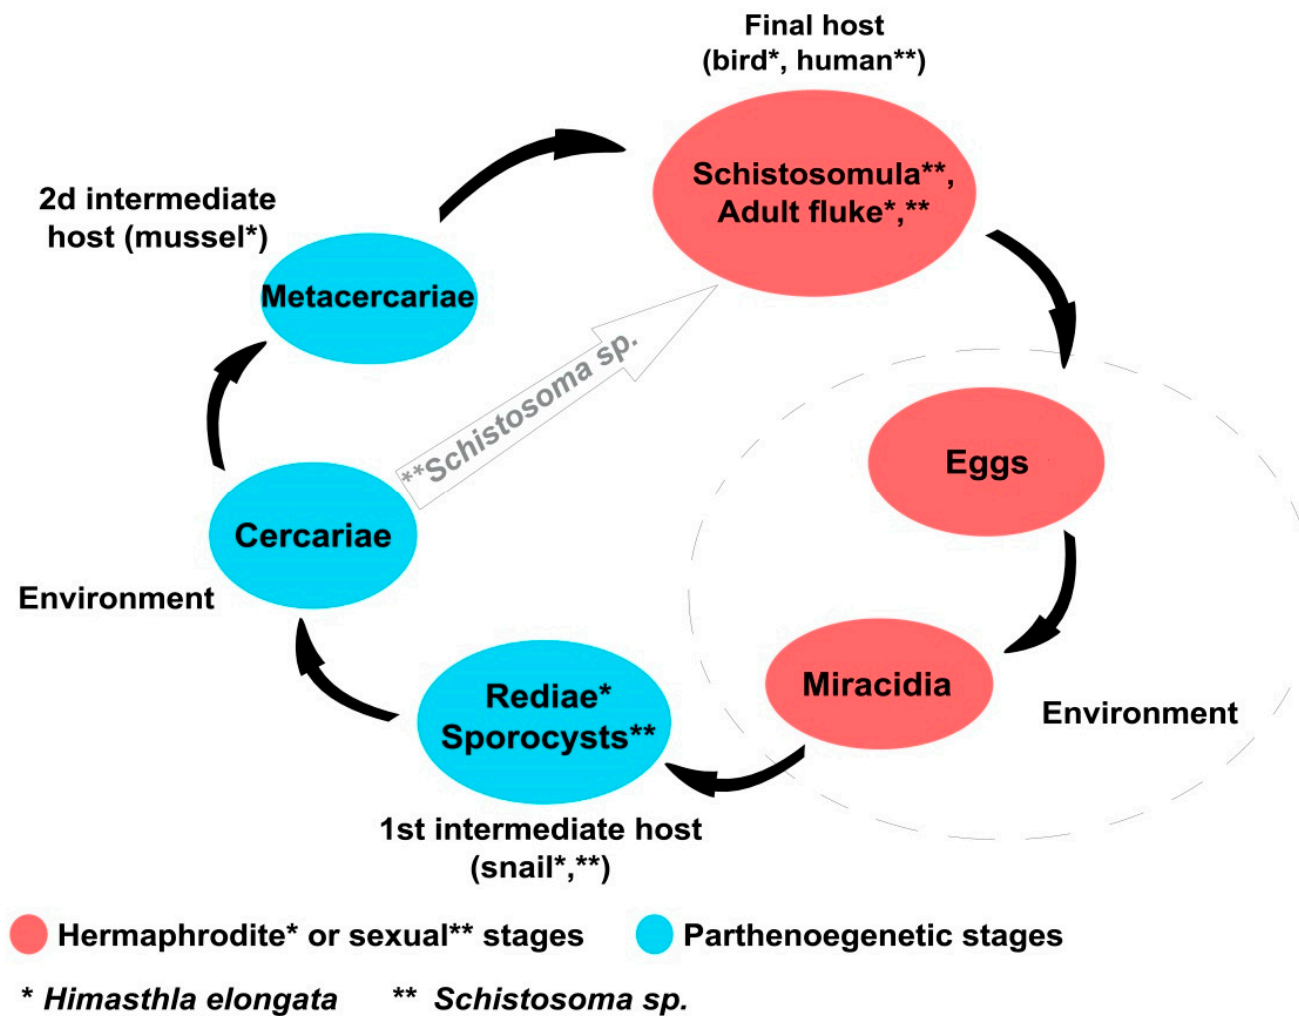

**Figure S1.** A schematic lifecycle of *Himasthla elongata* (Werding, 1969 ) and *Schistosoma sp.* (Loverde, 2019) trematodes. In *Schistosoma sp.* lifecycle, cercaria transforms in schistosomula, which then becomes adult worm. Red ellipses indicate stages that have sexual reproduction or that are their offsprings. Blue ellipses indicate stages that reproduce with parthenogenesis or parthenogenetic offsprings.

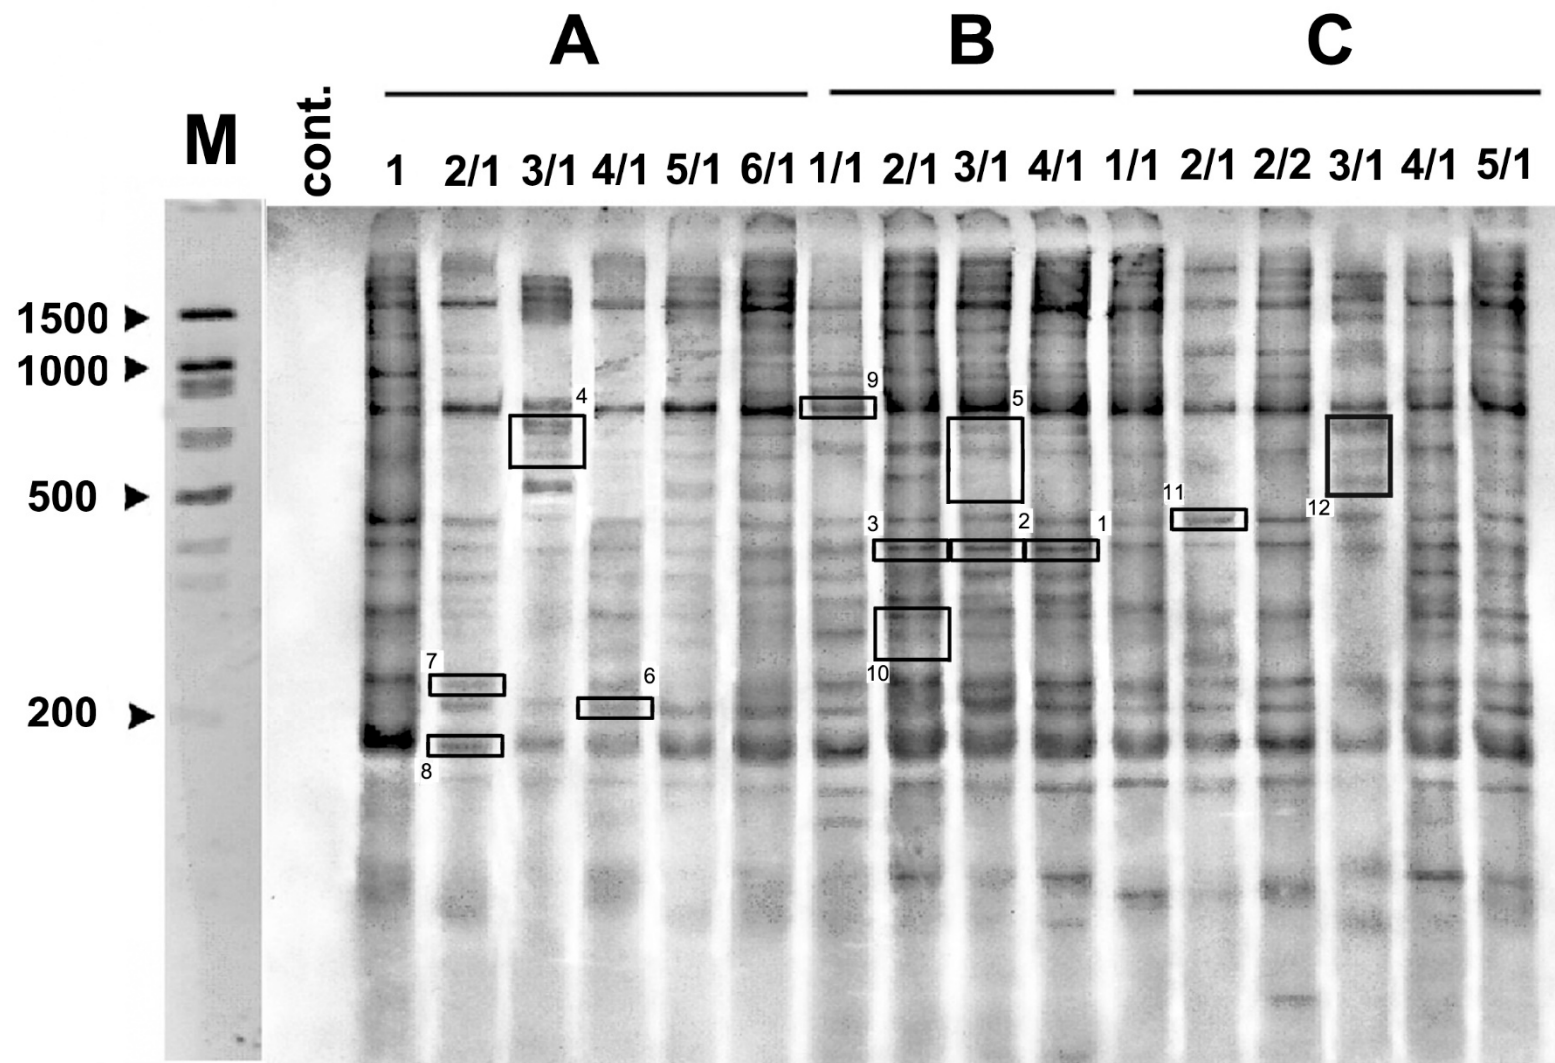

**Figure S2.** Autoradiography image of SAFLP gel carried out with redia (1) and cercariae (2/1, 3/1, etc.) from clonal populations A, B, and C. Vertical lines on the right indicate most variable fragments; black frames (1-12) mark the fragments chosen for cloning. M — molecular weight markers; cont. — PCR control (from Solovyeva et al., 2013 , with modifications).

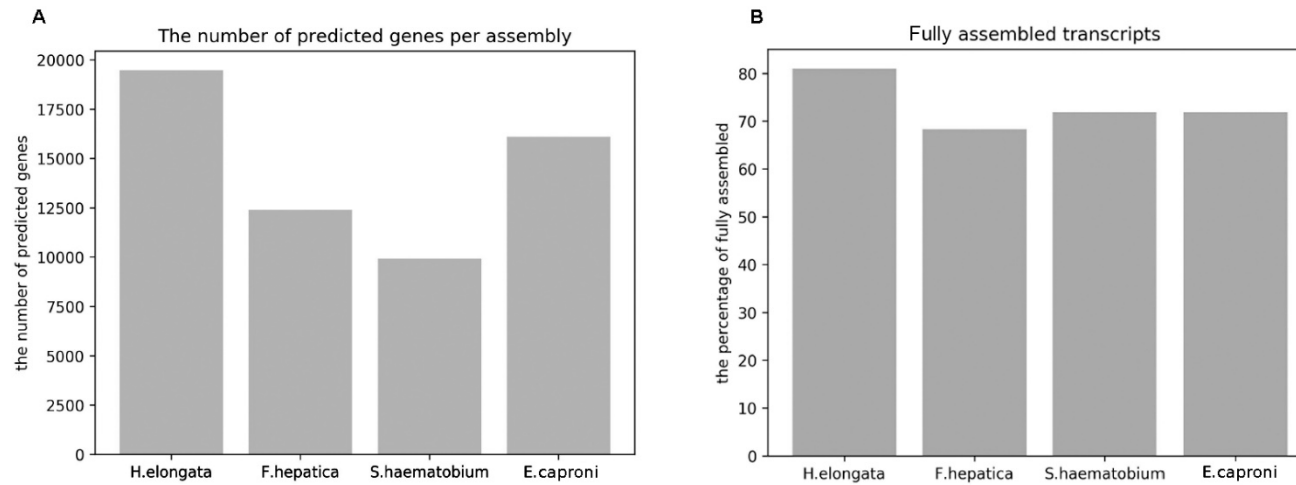

**Figure S3.** *H. elongata* transcriptome assembly quality evaluation. The quality of the *H. elongata* transcriptome assembly is estimated as a number of predicted genes (A) and fully assembled transcripts (B) in comparison with *Fasciola hepatica*, *Schistosoma haematobium* and *Echinostoma caproni* transcriptomes.

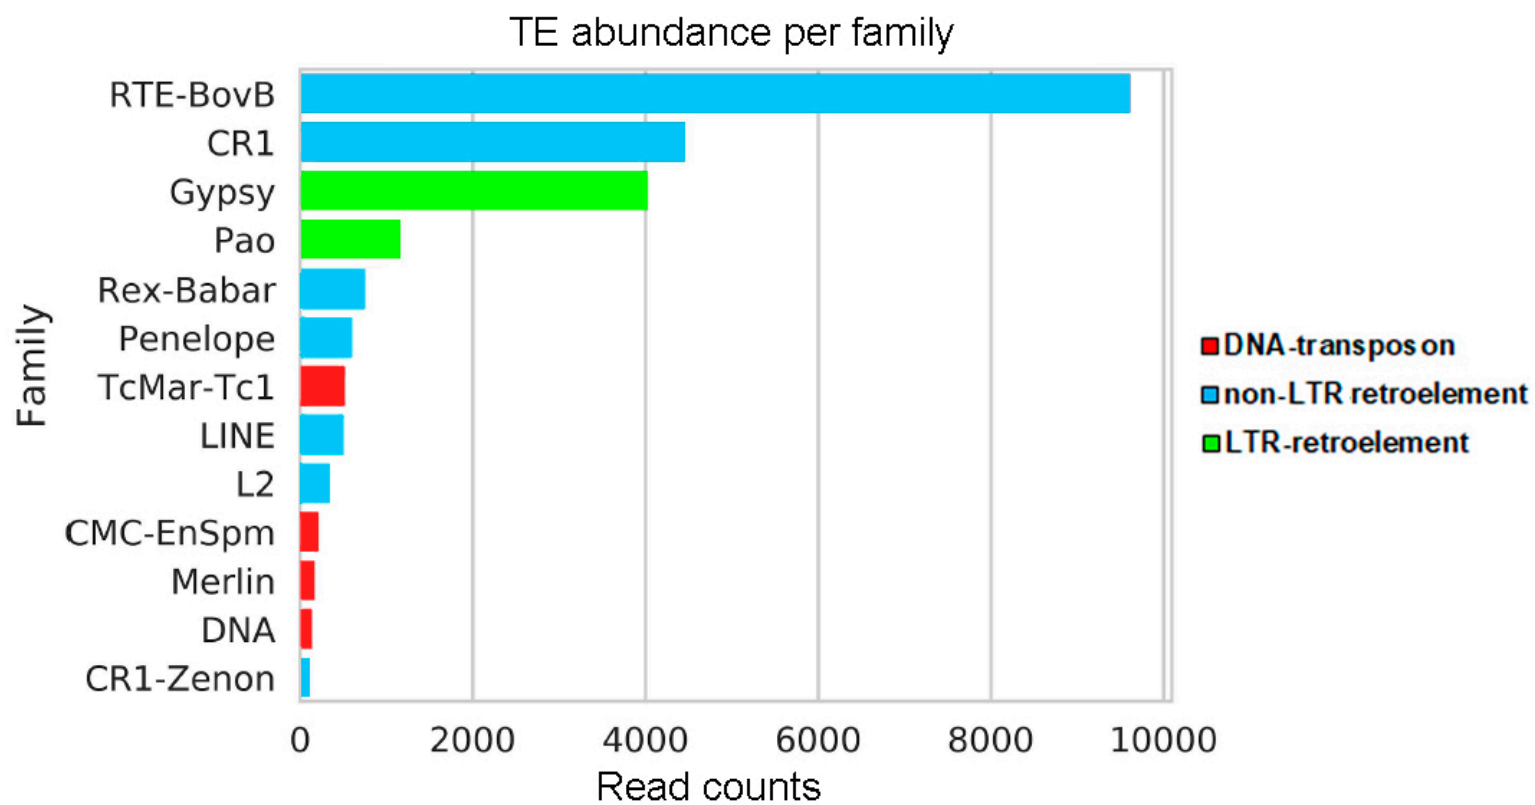

**Figure S4.** The distribution of transposable elements (TE) families in *H. elongata* transcriptome

**Table S1.** Annotation of the SAFLP cloned fragments.

| Nº | Name | L,<br>bp | GenBank<br>ID | RBase | Class/family | Sim   | Z | CDS | T | RGC. | TPM    | Est_counts |
|----|------|----------|---------------|-------|--------------|-------|---|-----|---|------|--------|------------|
| 1  | 1_1  | 563      | MK287490      | –     | –            | –     | C | –   | + | –    | 0.0008 | 3.26 e-05  |
| 2  | 1_2  | 530      | MK287491      | –     | –            | –     | C | –   | + | –    | 1      | 31.27      |
| 3  | 1_5  | 551      | MK287492      | MuDR- | DNA/MuDR     | 0.736 | C | –   | + | +    | 20.89  | 607.58     |

|    |              |     |          |                 |                 |       |   |   |              |   |   |         |        |
|----|--------------|-----|----------|-----------------|-----------------|-------|---|---|--------------|---|---|---------|--------|
| 4  | 2_1          | 570 | MK287493 | 1_ROr           | -               | -     | - | C | -            | - | + | -       | -      |
| 5  | 2_5          | 547 | MK287494 | MuDR-1_ROr      | DNA/MuDR        | 0.717 |   | C | -            | + | + | 4837    | 164.11 |
| 6  | 3_4          | 296 | MK287495 | -               | -               | -     |   | C | -            | + | + | 9087.06 | 71     |
| 7  | 3_5          | 217 | MK287496 | -               | -               | -     |   | C | MFS          | - | - | -       | -      |
| 8  | 3_8          | 261 | MK287497 | -               | -               | -     |   | C | -            | + | + | 1621.72 | 9      |
| 9  | 3_10         | 569 | MK287498 | -               | -               | -     |   | C | -            | + | + | 3923.58 | 143    |
| 10 | 4_13         | 829 | MK287499 | MtPH-A6-2-Ia    | DNA/Harbinger   | 0.710 |   | P | -            | + | + | 6781.93 | 449.61 |
| 11 | 4_14         | 317 | MK287500 | -               | -               | -     |   | P | -            | - | - | -       | -      |
| 12 | Tad_4_20     | 498 | MK287501 | Tad1-35_BG      | Non-LTR /Tad1   | 0.792 |   | P | -            | - | - | -       | -      |
| 13 | 6_2          | 320 | MK287502 | -               | -               | -     |   | C | -            | + | - | 6715    | 1      |
| 14 | 7_5          | 338 | MK287503 | -               | -               | -     |   | C | -            | - | - | -       | -      |
| 15 | 8_1          | 324 | MK287504 | -               | -               | -     |   | C | -            | + | - | 6715    | 1      |
| 16 | 8_3          | 322 | MK287505 | -               | -               | -     |   | C | -            | + | - | 6715    | 1      |
| 17 | 9_1          | 429 | MK287506 | Gypsy-32_DP-LTR | LTR/Gypsy       | 0.766 |   | C | -            | - | - | -       | -      |
| 18 | 9_2          | 413 | MK287507 | EptSINE1        | Non-LTR /SINE2  | 0.750 |   | C | -            | + | + | 993285  | 776    |
| 19 | 10_1         | 464 | MK287508 | EptSINE1        | Non-LTR /SINE2  | 0.750 |   | P | -            | + | + | 21725.3 | 530.99 |
| 20 | 10_4         | 469 | MK287509 | EptSINE1        | Non-LTR /SINE2  | 0.750 |   | P | -            | + | + | 0.128   | 0.0032 |
| 21 | 11_1         | 408 | MK287510 | SR2             | Non-LTR/RTE     | 0.895 |   | C | SLC5-6       | + | + | 14719.4 | 268    |
| 22 | 12_2         | 349 | MK287511 | -               | -               | -     |   | P | -            | - | - | -       | -      |
| 23 | 12_3         | 467 | MK287512 | -               | -               | -     |   | P | -            | - | - | -       | -      |
| 24 | ADF-gelsolin | 567 | MK287513 | Daphne-3_HMM    | Non-LTR /Daphne | 0.796 |   | C | ADF_gelsolin | + | - | 755840  | 2734   |
| 25 | BEL-5_1      | 732 | MK287514 | BEL-1_CSa-I     | LTR/BEL         | 0.655 |   | P | RVE          | + | + | 210.733 | 29.43  |
| 26 | BEL-12_1     | 724 | MK287515 | BEL-1_CSa-I     | LTR/BEL         | 0.666 |   | P | RVE          | + | + | 545.148 | 29.57  |
| 27 | Copia-4_10   | 476 | MK287516 | Copia-90_ALY-I  | LTR/Copia       | 0.788 |   | P | -            | - | - | -       | -      |
| 28 | CR1_A1       | 542 | MK287517 | CR1-25_SP       | Non-LTR /CR1    | 0.695 |   | C | RT           | + | + | 4700.83 | 156.79 |

|    |           |     |          |                               |                  |                 |   |    |   |   |         |         |
|----|-----------|-----|----------|-------------------------------|------------------|-----------------|---|----|---|---|---------|---------|
| 29 | CR1_B1    | 525 | MK287518 | CR1-25_SP                     | Non-LTR /CR1     | 0.621           | C | RT | + | + | 90490.6 | 2841.56 |
| 30 | CR1_B2    | 543 | MK287519 | CR1-<br>X1_Pass,<br>CR1-6_CTe | Non-LTR /CR1     | 0.719,<br>0.671 | C | RT | + | + | 3904.71 | 130.68  |
| 31 | CR1_B3    | 523 | MK287520 | CR1-<br>X1_Pass,<br>CR1-23_HM | Non-LTR /CR1     | 0.724,<br>0.674 | C | RT | + | + | 28293.5 | 881.97  |
| 32 | CR1-rng   | 471 | MK287521 | –                             | –                | –               | P | –  | + | + | 25041.9 | 632     |
| 33 | CR1-4_7   | 525 | MK287522 | CR1-25_SP,<br>CR1-<br>X1_Pass | Non-LTR /CR1     | 0.617,<br>0.759 | P | RT | + | + | 6910.45 | 217     |
| 34 | Gypsy-4_9 | 423 | MK287523 | Gypsy-<br>32_DP-LTR           | LTR/Gypsy        | 0.766           | P | –  | – | – | –       | –       |
| 35 | RTE_A2    | 475 | MK287524 | RTEX-<br>14_ACar              | Non-LTR<br>/RTEX | 0.750           | C | RT | + | + | 2724.07 | 70      |
| 36 | RTE-4_1   | 931 | MK287525 | RTE-2_NVi                     | Non-LTR /RTE     | 0.703           | P | –  | + | + | 18003.5 | 1404.39 |

Fragments were cloned from zones indicated by black frames 1–3, 6–11 in fig. S4; previously sequenced fragments RTE-A2, CR1-A1, CR1\_B1-B3 obtained from conserved bands after AFLP pre-amplification [26, main text] added to the analysis; № — row number; name — name of cloned sequence, numbers do not correspond to the zone in the gel; L — length of the cloned fragment; Z — electrophoretic zone from which the fragment was cut: C — conservative zone, P — polymorphic zone; TPM — transcripts per million metrics, RGC — repeat contigs in genome, Est\_counts — estimated counts of transcriptome reads, mapped to cloned fragments; both, TPM and Est\_counts metrics, calculated with Kallisto tool. RBase — the result of search in Repbase with RepeatMasker in the overlapping sequence region between transcript and cloned fragment; Class/family — class or family for detected TE according to RepBase; Sim — similarity; CDS (Conserved Domain Search) — superfamily of conserved domains found in Conserved Domain Database in the overlapping sequence region between transcript and cloned fragment; RT — reverse transcriptase; RVE — integrase core domain.

**Table S2.** Transposable elements (TE) content in sequenced trematode genomes in %.

| Organism | Genome Size (Gb) | TE % in genome | Non-LTR elements, LINE prevail | LTR | DNA transposons | Other repetitive sequences, including unclassified TE | References |
|----------|------------------|----------------|--------------------------------|-----|-----------------|-------------------------------------------------------|------------|
|----------|------------------|----------------|--------------------------------|-----|-----------------|-------------------------------------------------------|------------|

|                                |      |       |        |        |         |        |           |
|--------------------------------|------|-------|--------|--------|---------|--------|-----------|
| <i>Schistosoma mansoni</i>     | 0.4  | 45    | 17     | 15     | <1      | 13     | [1,2]     |
| <i>Schistosoma japonicum</i>   | 0.4  | 45    | 18     | 6      | 0.77    | 21     | [2–4]     |
| <i>Schistosoma haematobium</i> | 0.37 | 43.26 | 32.65  | 11.24  | <1%     | 6.94   | [2,5]     |
| <i>Opisthorchis viverrini</i>  | 0.62 | 30.6  | 13.1   | 5.84   | 3.1     | 11.68  | [2,6,7]   |
| <i>Fasciola hepatica</i>       | 1.14 | 32/55 | 25.45* | 10.12* | 4.26    | 16.33* | [2,8,9]   |
| <i>Clonorchis sinensis</i>     | 0.56 | 25.90 | 10.40  | 1.03   | 2.4     | 14.49  | [2,7,10]  |
| <i>H.elongata</i>              | 1.2  | 39.81 | 20.93  | 14.28  | unknown | 8,99   | This work |

\*Our data, unpublished.

#### References:

1. Brindley, P.J.; Copeland, C.S.; Kalinna, B.H. Schistosome Retrotransposons BT - Schistosomiasis. In; Secor, W.E., Colley, D.G., Eds.; Springer US: Boston, MA, 2005; pp. 13–26 ISBN 978-0-387-23362-8.
2. Howe, K.L.; Bolt, B.J.; Shafie, M.; Kersey, P.; Berriman, M. WormBase ParaSite – a comprehensive resource for helminth genomics. *Mol. Biochem. Parasitol.* **2017**, *215*, 2–10, doi:10.1016/j.molbiopara.2016.11.005.
3. Zhou, Y.; Zheng, H.; Chen, Y.; Zhang, L.; Wang, K.; Guo, J.; Huang, Z.; Zhang, B.; Huang, W.; Jin, K.; et al. The *Schistosoma japonicum* genome reveals features of host-parasite interplay. *Nature* **2009**, *460*, 345–351, doi:10.1038/nature08140.
4. Luo, F.; Yin, M.; Mo, X.; Sun, C.; Wu, Q.; Zhu, B.; Xiang, M.; Wang, J.; Wang, Y.; Li, J.; et al. An improved genome assembly of the fluke *Schistosoma japonicum*. *PLoS Negl. Trop. Dis.* **2019**, *13*, doi:10.1371/journal.pntd.0007612.
5. Young, N.D.; Jex, A.R.; Li, B.; Liu, S.; Yang, L.; Xiong, Z.; Li, Y.; Cantacessi, C.; Hall, R.S.; Xu, X.; et al. Whole-genome sequence of *Schistosoma haematobium*. *Nat. Genet.* **2012**, *44*, 221–225, doi:10.1038/ng.1065.
6. Young, N.D.; Nagarajan, N.; Lin, S.J.; Korhonen, P.K.; Jex, A.R.; Hall, R.S.; Safavi-Hemami, H.; Kaewkong, W.; Bertrand, D.; Gao, S.; et al. The *Opisthorchis viverrini* genome provides insights into life in the bile duct. *Nat. Commun.* **2014**, *5*, doi:10.1038/ncomms5378.
7. Ershov, N.I.; Mordvinov, V.A.; Prokhortchouk, E.B.; Pakharukova, M.Y.; Gunbin, K. V.; Ustyantsev, K.; Genaev, M.A.; Blinov, A.G.; Mazur, A.; Boulygina, E.; et al. New insights from *Opisthorchis felinus* genome: Update on genomics of the epidemiologically important liver flukes. *BMC Genomics* **2019**, *20*, 1–23, doi:10.1186/s12864-019-5752-8.
8. Cwiklinski, K.; Dalton, J.P.; Dufresne, P.J.; La Course, J.; Williams, D.J.; Hodgkinson, J.; Paterson, S. The *Fasciola hepatica* genome: gene



duplication and polymorphism reveals adaptation to the host environment and the capacity for rapid evolution. *Genome Biol.* **2015**, *16*, 71, doi:10.1186/s13059-015-0632-2.

9. McNulty, S.N.; Tort, J.F.; Rinaldi, G.; Fischer, K.; Rosa, B.A.; Smircich, P.; Fontenla, S.; Choi, Y.J.; Tyagi, R.; Hallsworth-Pepin, K.; et al. Genomes of *Fasciola hepatica* from the Americas Reveal Colonization with *Neorickettsia* Endobacteria Related to the Agents of Potomac Horse and Human Sennetsu Fevers. *PLoS Genet.* **2017**, *13*, 1–25, doi:10.1371/journal.pgen.1006537.
10. Huang, Y.; Chen, W.; Wang, X.; Liu, H.; Chen, Y.; Guo, L.; Luo, F.; Sun, J.; Mao, Q.; Liang, P.; et al. The Carcinogenic Liver Fluke, *Clonorchis sinensis*: New Assembly, Reannotation and Analysis of the Genome and Characterization of Tissue Transcriptomes. *PLoS One* **2013**, *8*, doi:10.1371/journal.pone.0054732.

**Table S3.** CR1-rng containing transcripts and their composition.

| N | Transcript ID                              | Length | Strand (+/-) | CR1-rng position | ORFs | ORF direction | ORF position | ORF Rep-Base annotation              | ORF conserved domains                     | Blast/CDD results                                                                                                                                    |
|---|--------------------------------------------|--------|--------------|------------------|------|---------------|--------------|--------------------------------------|-------------------------------------------|------------------------------------------------------------------------------------------------------------------------------------------------------|
| 1 | NODE_2385_length_3259_cov_15.7125_g1893_i0 | 3259   | -            | 1 - 445          | 1    | -3            | 701-3        | CR1-3_LMi,<br>CR1-1_LSal             | -                                         | Unkn CLF_113194 (GAA57785.1),<br>CR1-25_BF<br>Tektin-1( RJW61859.1)<br>Jockey (RJW62148.1)<br>Unkn (VDP21410.1) EEP                                  |
|   |                                            |        |              |                  | 2    | -3            | 1976-1389    | CR1-27_BF,<br>CR1-75_HM,<br>PERERE-2 | -                                         | Unkn T265_13856 ( XP_009169133.1)<br>CR1-D<br>Unkn CLF_104501(GAA54640.1)<br>EEP                                                                     |
|   |                                            |        |              |                  | 3    | -2            | 1350-871     | CR1-24_SP                            | Endonuclease-RT                           | Unkn CLF_113134(GAA57732.1)<br>EEP<br>Jockey (RJW71306.1)<br>Unkn (VDP21410.1) EEP                                                                   |
| 2 | NODE_3111_length_2866_cov_14.6702_g1893_i1 | 2866   | -            | 470-94           | 1    | -3            | 1583-996     | CR1-27_BF,<br>CR1-75_HM,<br>PERERE-2 | -                                         | Unkn T265_13856 (XP_009169133.1)<br>Jockey (RJW73052.1)<br>Unkn CLF_104501(GAA54640.1)<br>EEP                                                        |
|   |                                            |        |              |                  | 2    | -2            | 957-478      | CR1-24_SP                            | EEP                                       | Unkn CLF_113134(GAA57732.1)<br>EEP<br>Jockey (RJW71306.1)                                                                                            |
|   |                                            |        |              |                  | 3    | -3            | 2711-2274    | Crack-1_NV                           | PHD(Plant-homeodomain) finger superfamily | -                                                                                                                                                    |
| 3 | NODE_3544_length_2689_cov_120.374_g1880_i1 | 2689   | -            | 2566-2689        | 1    | -2            | 2322-1       | CR1-10_CTe<br>PERERE-7<br>PERERE-4   | RT<br>Endonuclease/ EEP family            | Unkn (VDP36673.1) EEP +RT<br>TPA: endonuclease- RT<br>(CAJ00238.1)<br>putative RNA-directed DNA polymerase from transposon X-element<br>(RJW68646.1) |
| 4 | NODE_7147_length_1759_cov_50.6825_g5205_i0 | 1759   | +            | 40-1             | 1    | -1            | 994-2        | CR1-1_MUn                            | Endonuclease - RT                         | Unkn CLF_111752(GAA56885.1)                                                                                                                          |

|    |                                              |      |   |           |   |     |          |                                   |     |  |                                                                                                                     |
|----|----------------------------------------------|------|---|-----------|---|-----|----------|-----------------------------------|-----|--|---------------------------------------------------------------------------------------------------------------------|
|    |                                              |      |   |           |   |     |          | PERERE-2<br>CR1-3b_LCh            |     |  | EEP<br>Unkn CLF_106547(GAA55043.1)<br>EEP<br>Jockey (RJW73052.1)                                                    |
|    |                                              |      |   |           | 2 | -2  | 1731-766 | DIRS-21_PSi<br>LTR-<br>18C_OS-LTR |     |  | Unkn DUF601 cl27239-                                                                                                |
| 5  | NODE_8652_length_1522_cov_47.5467_g6190_i0   | 1522 | + | 1341-1522 | 1 | -2; | 807-67   | PERERE-2,<br>Jockey-<br>1_DGri    | RT  |  | Unkn (VDP91589.1) RT<br>Unkn (VDP66609.1) RT<br>TPA: endonuclease-RT<br>(CAJ00235.1)<br>Unkn CLF_111238(GAA53824.1) |
|    |                                              |      |   |           | 2 | +2  | 965-1522 | CR1-25_BF                         | EEP |  | EEP<br>Unkn CLF_103784<br>(GAA49922.1)EEP<br>Jockey (RJW73052.1)                                                    |
| 6  | NODE_27509_length_452_cov_359.529_g21296_i0  | 452  | + | 50-160    | 1 | +2  | 80-451   | CR1-25_SP                         | -   |  | Jockey RJW61344.1<br>Unkn CLF_112559(GAA57342.1)                                                                    |
| 7  | NODE_30251_length_408_cov_2.49292_g23978_i0  | 408  | + | 4-244     | 1 | +1  | 34-408   | -                                 | -   |  | Unkn CLF_108868(GAA52820.1)<br>Jockey (RJW70927.1)                                                                  |
| 8  | NODE_30581_length_404_cov_1.08883_g24306_i0  | 404  | + | 266-357   | 1 | +1  | 160-333  | -                                 | -   |  | -                                                                                                                   |
| 9  | NODE_34554_length_359_cov_3.39803_g28263_i0  | 359  | + | 9-242     | 1 | -2  | 328-41   | -                                 | -   |  | -                                                                                                                   |
| 10 | NODE_35285_length_352_cov_3.81145_g28994_i0  | 352  | + | 210-352   | 1 | +2  | 8-352    | CR1-21_BF<br>CR1-9_Crp            | -   |  | Unkn CLF_108391(GAA52583.1)<br>Unkn CLF_104501(GAA54640.1)<br>EEP<br>Jockey (RJW73052.1)                            |
| 11 | NODE_37825_length_331_cov_3.95652_g31534_i0  | 331  | + | 120-221   | 1 | +3  | 3-141    | -                                 | -   |  | Unkn CLF_107365(GAA52116.1)<br>Unkn CLF_107385(GAA52133.1)<br>Jockey (RJW73052.1)                                   |
| 12 | NODE_37797_length_331_cov_340.844_g31506_i0  | 331  | - | 230-1     | 1 | -2  | 288-1    | CR1-6_CTe                         | -   |  | BRO1 domain-containing protein<br>BROX(RJW63605.1)<br>Jockey (RJW73052.1),                                          |
| 13 | NODE_65978_length_249_cov_0.979381_g59687_i0 | 249  | - | 242-90    | 1 | -2  | 230-3    | -                                 | -   |  | putative serine/threonine-protein<br>phosphatase PP2A regulatory sub-                                               |

|    |                                             |     |   |         |   |    |        |           |                             |
|----|---------------------------------------------|-----|---|---------|---|----|--------|-----------|-----------------------------|
|    |                                             |     |   |         |   |    |        |           | unit (RJW59571.1)           |
|    |                                             |     |   |         |   |    |        |           | Unkn CLF_107249(GAA52034.1) |
|    |                                             |     |   |         |   |    |        |           | EEP                         |
| 14 | NODE_95723_length_211_cov_2.08974_g89432_i0 | 211 | + | 85-161  | 1 | +3 | 9-167  | SR 1      | Unkn CLF_101864(GAA48644.1) |
|    |                                             |     |   |         |   |    |        |           | EEP                         |
|    |                                             |     |   |         |   |    |        |           | Jockey (RJW71220.1)         |
|    |                                             |     |   |         |   |    |        |           | Unkn CLF_111975(GAA56996.1) |
|    |                                             |     |   |         |   |    |        |           | EEP                         |
| 15 | NODE_97540_length_209_cov_1.70779_g91249_i0 | 209 | + | 137-209 | 1 | +1 | 31-207 | CR1-21_BF | Unkn CLF_107284(GAA52066.1) |
|    |                                             |     |   |         |   |    |        | -         | EEP                         |
|    |                                             |     |   |         |   |    |        |           | Jockey (RJW61935.1)         |
| 16 | NODE_116140_length_150_cov_2_g109849_i0     | 150 | - | 150-1   | 1 | +2 | 11-100 | -         | -                           |

Table notes. Columns' names: N – number in the table; Length- fragments' lengths given in the separate column but originally included in Transcript ID in the transcriptome dataset; Strand (+/-) – CR1 used for search has orientation according to Repbase (+) and the transcript orientation given in attitude (in relation) to it; CR1-rng position – the CR1-rng position inside transcript given in transcripts' nucleotide Ns; ORFs – ORF fragments found in the transcript; Strand (+/-) – ORF orientation inside transcript; ORF position – ORF fragments position inside transcript given in transcripts' nucleotide Ns; ORF RepBase - ORF fragment annotation according to RepBase; ORF conserved domains – search shows that ORF fragment belongs to this proteins' conserved domain; Blast/CDD results – Blast search reveals the similarity of ORF fragments with the proteins indicated: **Unkn** – hypothetical protein, unnamed protein product or protein of unknown function. **Jockey** – RNA-directed DNA polymerase from mobile element Jockey; **RT** – reverse transcriptase; **EEP** – Exonuclease-Endonuclease-Phosphatase. The putative domains of the unknown proteins were determined by search in Conserved Domain Database(Marchler-Bauer et al.,2015).
